# Supplementary material
Source: PubMed Central journal article supplement (PMC4583656)
Supplement: NIHMS717980-supplement-Suppl.pdf [file NIHMS717980-supplement-Suppl.pdf]

# Figure S1

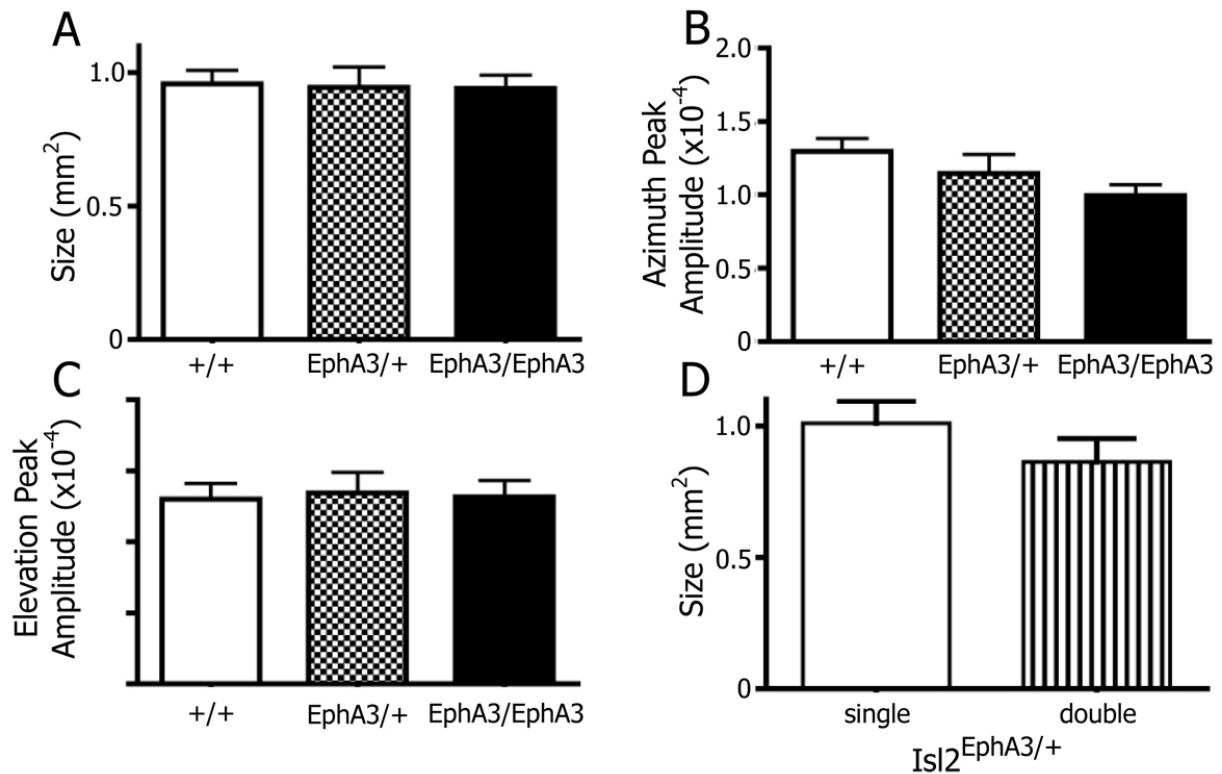

**Figure S1, refers to Figure 1.** Size and strength of functional representations are unchanged in  $Isl2^{EphA3}$  knock-in mice. A) Quantification of average SC map size in wild type (+/+, white), heterozygous ( $EphA3/+$ , checkered), and homozygous ( $EphA3/EphA3$ , black) knock-in mice. B & C) Quantification of average peak amplitude of response in the azimuth (B) and elevation (C) representation in wild type (+/+, white), heterozygous ( $EphA3/+$ , checkered), and homozygous ( $EphA3/EphA3$ , black) knock-in mice. D) Quantification of average map size in the SC of  $Isl2^{EphA3/+}$  in which the map was singular (white) or doubled (striped).

# Figure S2

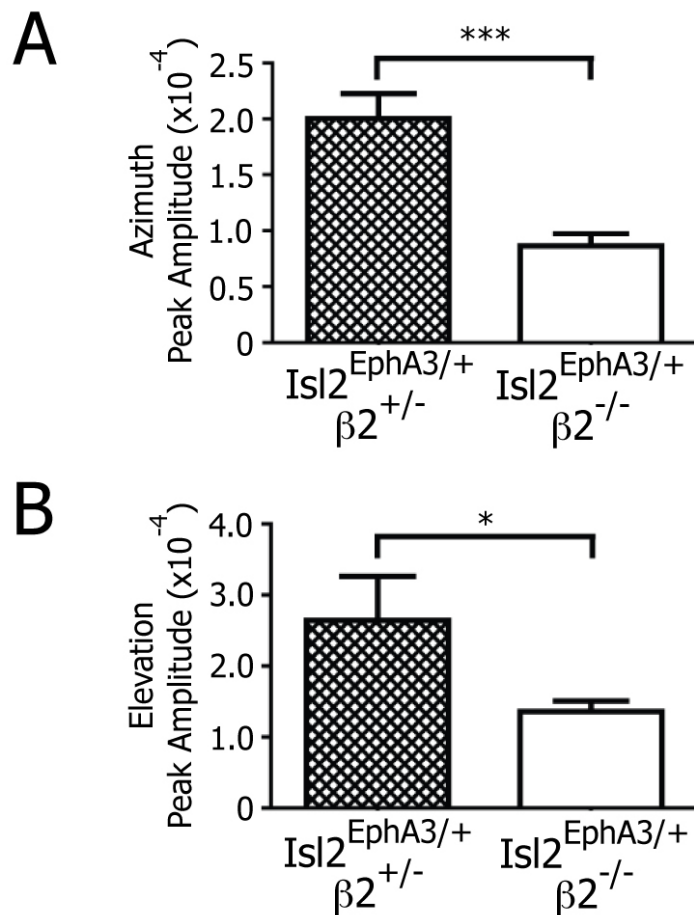

**Figure S2, refers to Figure 6.** Reduced peak response amplitude in functional representations in  $Isl2^{EphA3/+} \beta 2^{-/-}$  mice. A & B) Quantification of average peak amplitude of response in the azimuth (A) and elevation (B) representation in  $Isl2^{EphA3/+} \beta 2^{+/-}$  (checked) and  $Isl2^{EphA3/+} \beta 2^{-/-}$  (white) mice

Figure S3

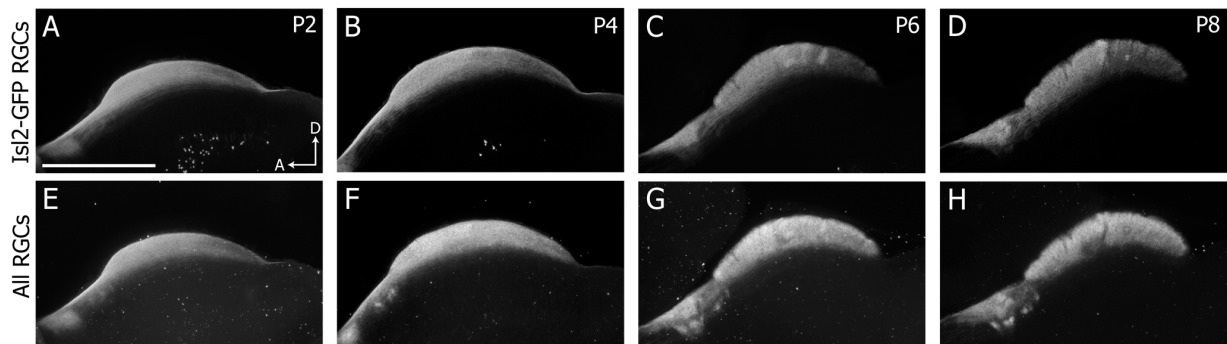

**Figure S3, refers to Figure 7.** Developmental projection patterns of  $Isl2^+$  RGCs in  $Isl2^{EphA3/+}$  mice. A-D) Parasagittal sections through the SC of  $Isl2^{EphA3/+};Isl2-GFP$  mice at postnatal day 2 (P2) (A), P4 (B), P6 (C), and P8 (D) reveals an early innervation of the entire anterior-posterior axis and gradual concentration of inputs in the anterior. E-H) Parasagittal sections through the SC of  $Isl2^{EphA3/+};Isl2-GFP$  mice at P2 (E), P4 (F), P6 (G), and P8 (H) in which CTB-555 was injected intraocularly one day prior reveals the projection patterns of all RGCs. Panels A & E, B & F, C & G, and D & H are the same section. *bar, 0.5 mm; A, anterior; D, dorsal*
